# Supplementary material for: An electrochemically deposited graphene@Mn3O4composite film for supercapacitors
Source: Royal Society of Chemistry journal article supplement (doi:10.1039/c5ra23496d), 2015-01-01
Supplement: c5ra23496d1.pdf [file c5ra23496d1.pdf]

## Supporting Information

# Electrochemical Deposited Graphene@Mn<sub>3</sub>O<sub>4</sub> Composite Film for Supercapacitor

Suzhen Cheng,<sup>a</sup> Shuo Li,<sup>a</sup> Ji Xia,<sup>a</sup> Tianhui Lei,<sup>a</sup> Quansheng Zhang,<sup>\*a</sup> and Jingying Xie,<sup>\*b</sup>

*School of Chemical and Environmental Engineering, Shanghai Institute of Technology, Shanghai 201418, China. E-mail: zhangquansheng@sit.edu.cn*

Shanghai Institute of Space Power Sources, Shanghai 200245, China. E-mail: jyxie@mail.sim.ac.cn

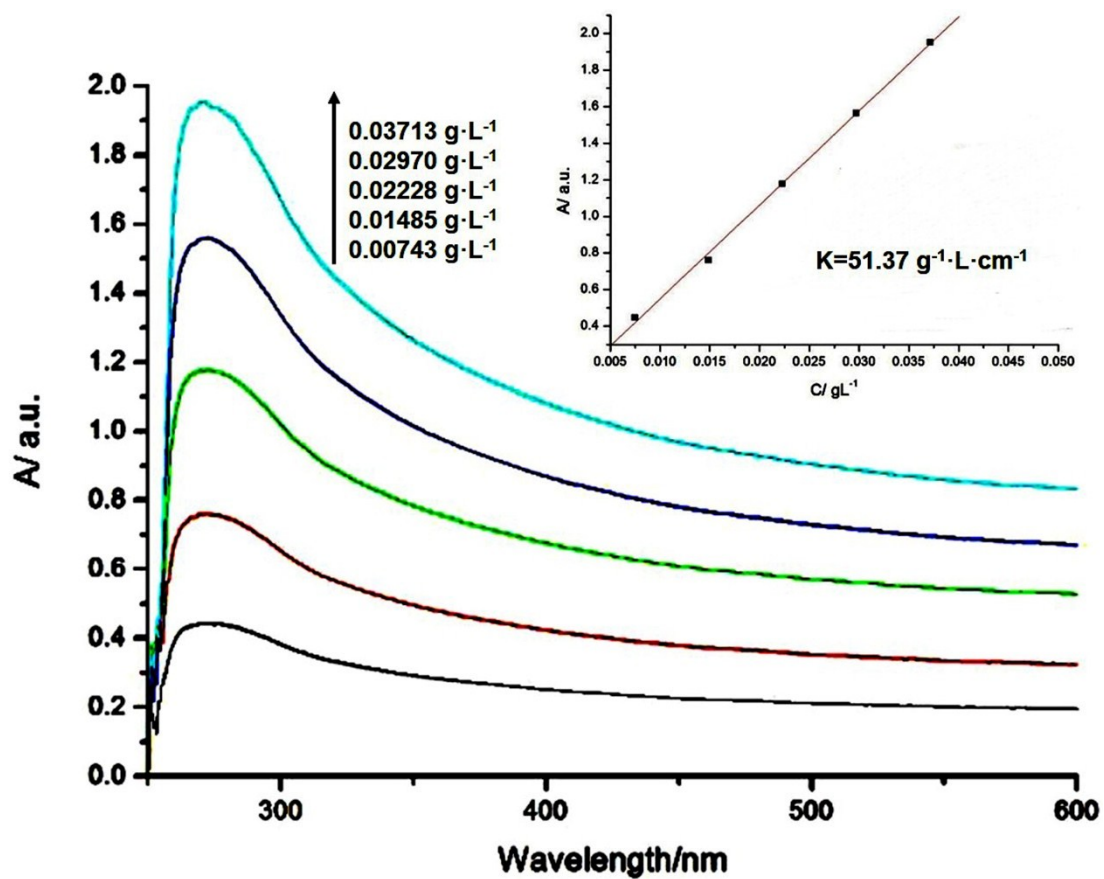

**Fig.S1** UV-vis absorption spectra of the graphene dispersion after centrifugation. Inset: the standard curve of concentration-absorbance.

The dispersion follows the Beer-Lambert law with an average absorption

$$\text{constant: } K= 51.37 \text{ g}^{-1} \cdot \text{L} \cdot \text{cm}^{-1}$$

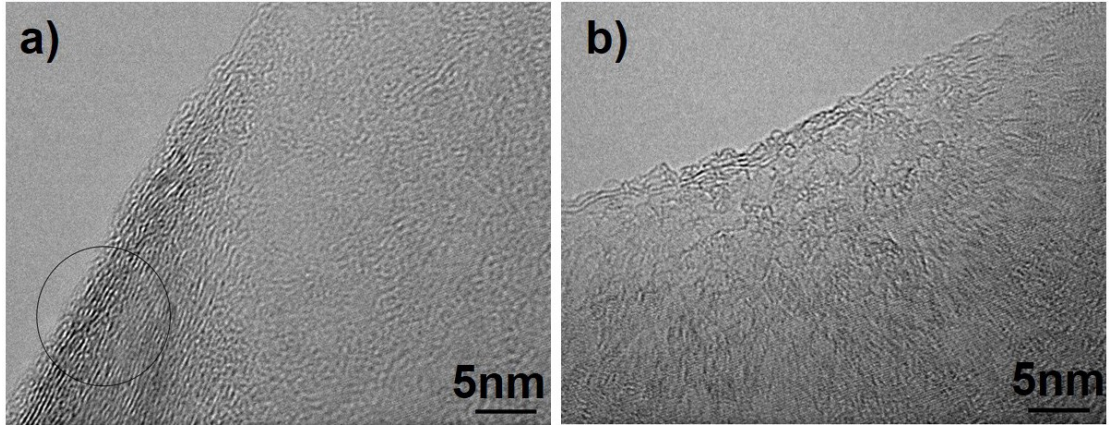

**Fig.S2** HRTEM images of graphene

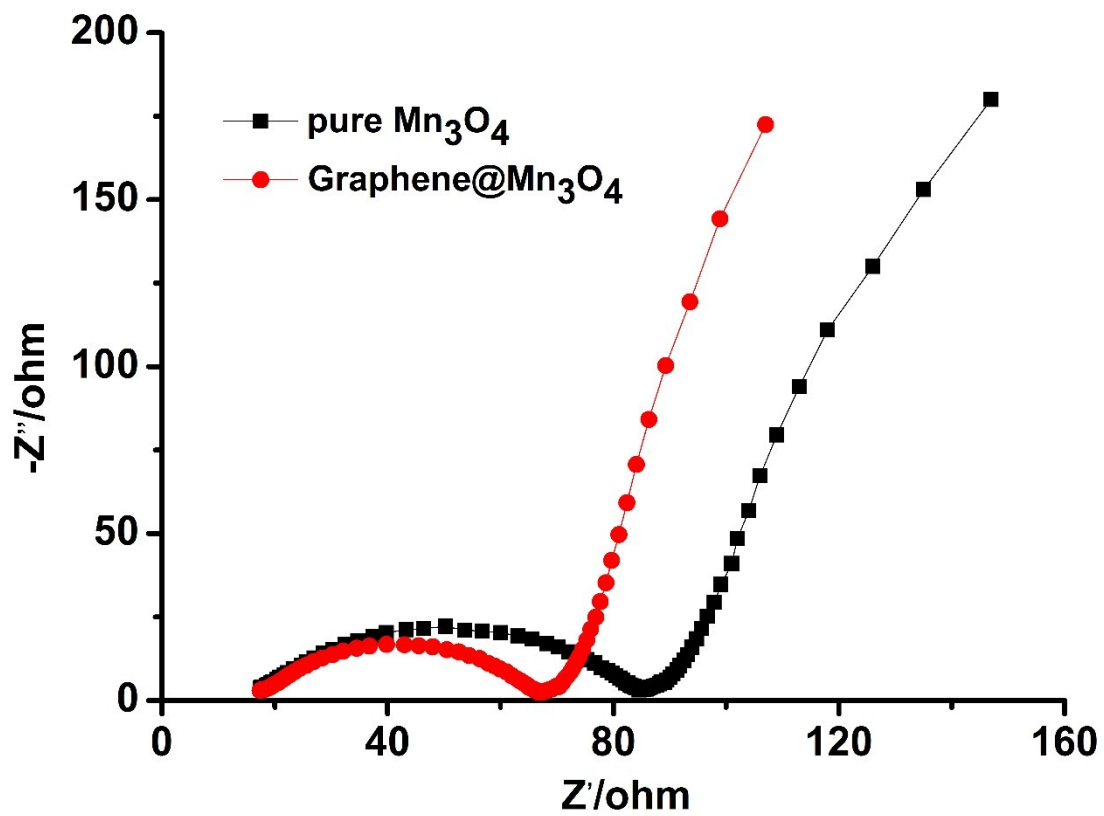

**Fig.S3** Nyquist plots of Mn<sub>3</sub>O<sub>4</sub> electrode and Graphene@Mn<sub>3</sub>O<sub>4</sub> electrode
